# Supplementary material for: Injectable biodegradable microcarriers for iPSC expansion and cardiomyocyte differentiation
Source: PubMed Central journal article supplement (PMC11348074; doi:10.1002/advs.202404355), 2024-06-20
Supplement: ADVS-11-2404355-s001.pdf [file ADVS-11-2404355-s001.pdf]

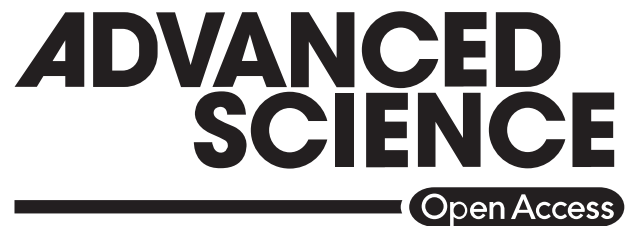

## Supporting Information

for *Adv. Sci.*, DOI 10.1002/adv.202404355

Injectable biodegradable microcarriers for iPSC expansion and cardiomyocyte differentiation

*Annalisa Bettini\**, *Patrizia Camelliti*, *Daniel J. Stuckey* and *Richard M. Day\**

## Supporting Information

### **Injectable biodegradable microcarriers for iPSC expansion and cardiomyocyte differentiation**

Annalisa Bettini\*, Patrizia Camelliti, Daniel J. Stuckey and Richard M. Day\*

**Video 1:** Beating iPSC-CM on TIPS microcarriers after 7 days in culture

**Video 2:** Beating iPSC-CM on TIPS microcarriers after 10 days in culture

**Video 3:** Beating iPSC-CM on TIPS microcarriers after 14 days in culture

| Type                    | Antibody                                 | Species raised in | Catalogue number | Supplier        | Dilution |
|-------------------------|------------------------------------------|-------------------|------------------|-----------------|----------|
| Primary                 | Caspase-3 (3G2) Mouse mAb                | Mouse             | 9668S            | Cell Signalling | 1:1500   |
| Primary                 | Cleaved Caspase-3 (Asp175) Antibody      | Rabbit            | 9661S            | Cell Signalling | 1:750    |
| Primary                 | Caspase-9 (C9) Mouse mAb                 | Mouse             | 9508S            | Cell Signalling | 1:1000   |
| Secondary               | Goat anti-rabbit IgG (H+L) HRP conjugate | Goat              | SA00001-2        | Protein-Tech    | 1:5000   |
| Secondary               | Goat anti-mouse IgG (H+L), HRP conjugate | Goat              | SA00001-1        | Protein-Tech    | 1:2000   |
| Primary loading control | GAPDH Mouse McAb                         | Mouse             | 60004-1-Ig       | Protein-tech    | 1:10'000 |

**Table S1: Western blot antibodies.**

| Antibody                       | Fluorochrome | Target location | Catalogue ID | Supplier        | Concentration                     |
|--------------------------------|--------------|-----------------|--------------|-----------------|-----------------------------------|
| LIVE/DEAD™                     | Near-IR      | /               | L10119       | Invitrogen      | 1:1000                            |
| iPSC Panel                     |              |                 |              |                 |                                   |
| SSEA-4                         | PE/Cyanine7  | Extracellular   | 330420       | Biolegend       | 1:20                              |
| TRA-1-60                       | FITC         | Extracellular   | 560380       | BD              | Pre-diluted at recommended volume |
| OCT3/4                         | BV510        | Intracellular   | 563524       | BD              | 1:20                              |
| SOX2                           | BV421        | Intracellular   | 656114       | Biolegend       | 1:50                              |
| iPSC-CM Panel                  |              |                 |              |                 |                                   |
| Cardiac Troponin T             | AF647        | Intracellular   | 565744       | BD              | 1:100                             |
| $\alpha$ -Actinin (Sarcomeric) | PE           | Intracellular   | 30-123-773   | Miltenyi Biotec | 1:50                              |

**Table S2: Flow cytometry antibodies.**

|              | Gene      | Accession ID   | Primer type             | Sequence (5'->3')        | Product length | Start | Stop  | Melting temperature | GC%   |
|--------------|-----------|----------------|-------------------------|--------------------------|----------------|-------|-------|---------------------|-------|
| Pluripotency | SOX2      | NM_003106.4    | Forward                 | GCTACAGCATGATGCAGGACCA   | 135            | 945   | 966   | 62.96               | 54.55 |
|              |           |                | Reverse                 | TCTGCGAGCTGGTCATGGAGTT   |                | 1079  | 1058  | 63.96               | 54.55 |
|              | POU5F1B   | NM_001159542.2 | Forward                 | TTCGGATTTTCGCCTTCTCGC    | 98             | 60    | 79    | 61.08               | 55    |
|              |           |                | Reverse                 | GGAAGCTTAGCCAGGTCAGA     |                | 157   | 138   | 59.09               | 55    |
|              | NANOG     | NM_024865      | Forward                 | CTCCAACATCCTGAACCTCAGC   | 115            | 569   | 590   | 60.94               | 54.55 |
|              |           |                | Reverse                 | CGTCACACCATTGCTATTCTTCG  |                | 683   | 661   | 60.24               | 47.83 |
| PODXL        | NM_005397 | Forward        | CCTGAACCTCACAGGAAACACC  | 136                      | 1247           | 1268  | 61.07 | 54.55               |       |
|              |           | Reverse        | TGGAACAGATGCCAGCCGTATG  |                          | 1382           | 1361  | 62.95 | 54.55               |       |
| Ectoderm     | ALDH1A0   | NM_000689.5    | Forward                 | TGCCGGGAAAAGCAATCTGA     | 95             | 824   | 843   | 60.25               | 50    |
|              |           |                | Reverse                 | CAACAGCATTGTCCAAGTCGG    |                | 918   | 898   | 60.07               | 52.38 |
|              | COL1A1    | NM_000088.4    | Forward                 | GAGGGCCAAGACGAAGACATC    | 140            | 203   | 223   | 60.74               | 57.14 |
|              |           |                | Reverse                 | CAGATCACGTCATCGCACAAAC   |                | 342   | 322   | 59.94               | 52.38 |
|              | PAX6      | NM_001604      | Forward                 | CTGAGGAATCAGAGAAGACAGGC  | 131            | 1275  | 1297  | 60.43               | 52.17 |
|              |           |                | Reverse                 | ATGGAGCCAGATGTGAAGGAGG   |                | 1405  | 1384  | 61.82               | 54.55 |
| DCX          | NM_000555 | Forward        | TGCCTCAGGGAGTGCCTTA     | 94                       | 535            | 553   | 60.91 | 57.89               |       |
|              |           | Reverse        | GAACAGACATAGCTTTCCCTTC  |                          | 628            | 606   | 59.06 | 47.83               |       |
| Endoderm     | AFP       | NM_001134      | Forward                 | TGAGCACTGTTGCAGAGGAG     | 96             | 698   | 717   | 59.97               | 55    |
|              |           |                | Reverse                 | TTGTTTGACAGAGTGTCTTGTTGA |                | 793   | 770   | 59                  | 37.5  |
|              | GATA1     | NM_002049      | Forward                 | TGCGGCCTCTATCACAAGATG    | 82             | 757   | 777   | 60.2                | 52.38 |
|              |           |                | Reverse                 | CTGCCGTTTACTGACAATCA     |                | 838   | 818   | 58.58               | 47.62 |
|              | SOX7      | NM_031439      | Forward                 | TCGACGCCCTGGATCAACT      | 143            | 1013  | 1031  | 60.98               | 57.89 |
|              |           |                | Reverse                 | CTGGGAGACCGGAACATGC      |                | 1155  | 1137  | 60.45               | 63.16 |
| CDH1         | NM_004360 | Forward        | GCCTCCTGAAAAGAGAGTGGAAG | 131                      | 1652           | 1674  | 60.87 | 52.17               |       |
|              |           | Reverse        | TGGCAGTGTCTCTCCAAATCCG  |                          | 1782           | 1761  | 62.57 | 54.55               |       |
| Mesoderm     | DCN       | NM_001920      | Forward                 | GCTCTCCTACATCCGCATTGCT   | 128            | 754   | 775   | 62.75               | 54.55 |
|              |           |                | Reverse                 | GTCCTTTCAGGCTAGCTGCATC   |                | 881   | 860   | 61.32               | 54.55 |
|              | GATA2     | NM_032638      | Forward                 | CAGCAAGGCTCGTTCCTGTTCA   | 150            | 1197  | 1218  | 63.32               | 54.55 |
|              |           |                | Reverse                 | ATGAGTGGTCGGTTCTGCCCAT   |                | 1346  | 1325  | 64                  | 54.55 |

|               |              |             |         |                           |     |      |      |       |       |
|---------------|--------------|-------------|---------|---------------------------|-----|------|------|-------|-------|
|               | <i>BMP4</i>  | NM_001202   | Forward | GCACTGGTCTTGAGTATCCTG     | 135 | 502  | 522  | 58.1  | 52.38 |
|               |              |             | Reverse | TGCTGAGGTTAAAGAGGAAACG    |     | 636  | 615  | 58.6  | 45.45 |
|               | <i>IGF2</i>  | NM_000612   | Forward | AGACGTA CTGTGCTACCCC      | 121 | 931  | 949  | 58.42 | 57.89 |
|               |              |             | Reverse | TGCTTCCAGGTGTCATATTGG     |     | 1051 | 1031 | 58    | 47.62 |
|               | <i>TBXT</i>  | NM_003181.4 | Forward | TGCTTCCCTGAGACCCAGTT      | 121 | 1061 | 1080 | 60.77 | 55    |
|               |              |             | Reverse | GATCACTTCTTTCCTTTGCATCAAG |     | 1181 | 1157 | 58.91 | 40    |
| House-keeping | <i>GAPDH</i> | NM_002046   | Forward | AATGAAGGGGTCATTGATGG      | 108 | 190  | 171  | 55.35 | 45    |
|               |              |             | Reverse | AAGGTGAAGGTCGGAGTCAA      |     | 83   | 102  | 58.58 | 50    |

**Table S3: qPCR Primers.** Oligonucleotide primers were designed using Primer Blast, to produce a PCR product size of 70-150 base pairs, predesigned to span or flank introns, anneal at 60°C, <55% GC content and synthesised on a 25 molar scale by Thermo Fisher.

**A. Selection of TIPS microsphere polymer composition**

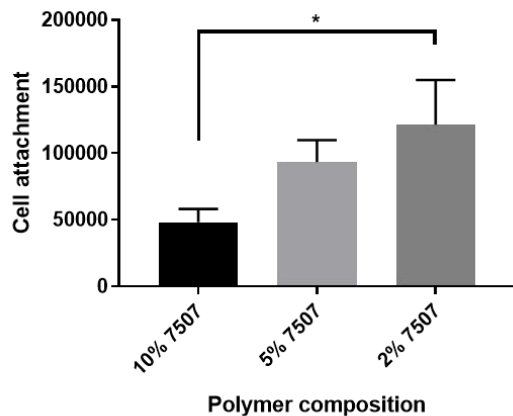

**B. Validation of coating method for iPSC attachment**

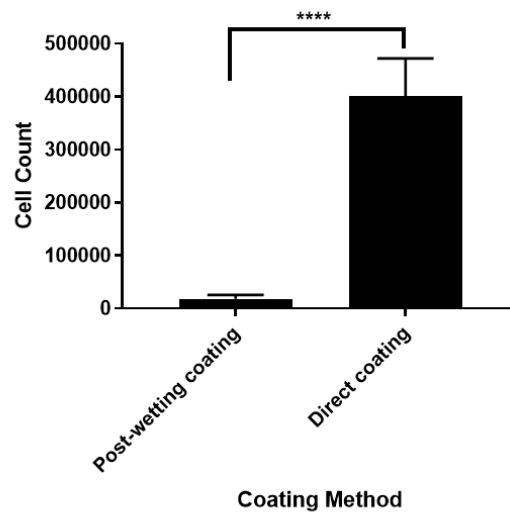

**Ci. Direct coating**

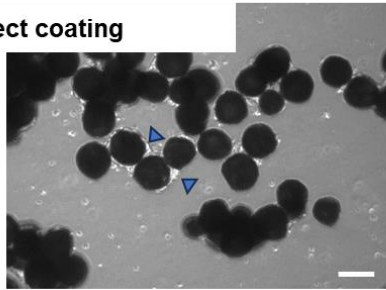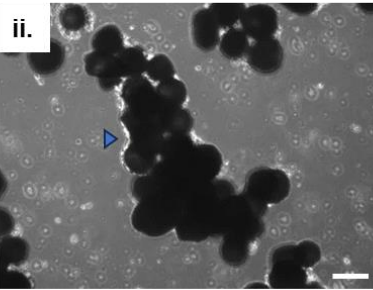

**Di. Post-wetting coating**

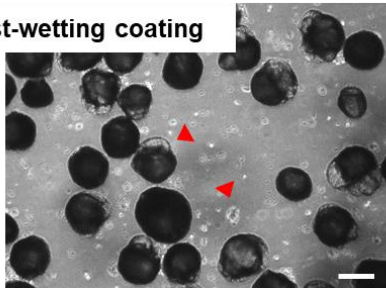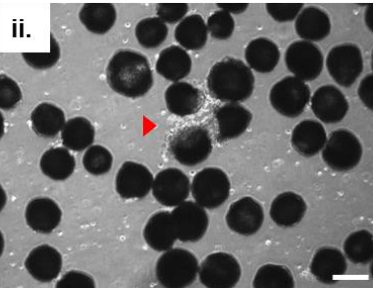

**Figure S1: Selection of TIPS microcarriers PLGA composition and pre-conditioning method.** (A) Quantification of iPSC attachment to 2%, 5% and 10% 7507 TIPS microcarriers.  $2.5 \times 10^5$  P10 iPSC were seeded on  $0.1 \text{ cm}^3$  of microcarriers and attached under static dynamic conditions over 24 hours. (B) Comparison of direct- versus post-wetting pre-conditioning of TIPS microcarriers.  $5 \times 10^5$  P7 iPSC were seeded on  $0.1 \text{ cm}^3$  of microcarriers and attached under static dynamic conditions over 24 hours. Post-wetting coating refers to exposure of the microcarriers to VTN-N, after pre-conditioning. Direct coating refers to exposure of the microcarriers to VTN-N during pre-conditioning. Representative images of iPSC attached to TIPS microcarriers coated (C) directly during the pre-conditioning process, or (D) post-conditioning. Blue arrows show cell attachment to the microcarriers, with formation of cellular connections between microcarriers. Red arrows show cellular clumping and uneven attachment of cells to the microcarriers. Scale bars represent  $100 \mu\text{m}$ . Data are presented as mean  $\pm$ SD. The significance of the data was calculated by (A) two-way ANOVA, Tukey's post-hoc correction and (B) Unpaired t-test two tailed. ( $n=6$ ,  $*P \leq 0.05$ ,  $***P \leq 0.001$ ,  $****P \leq 0.0001$ )

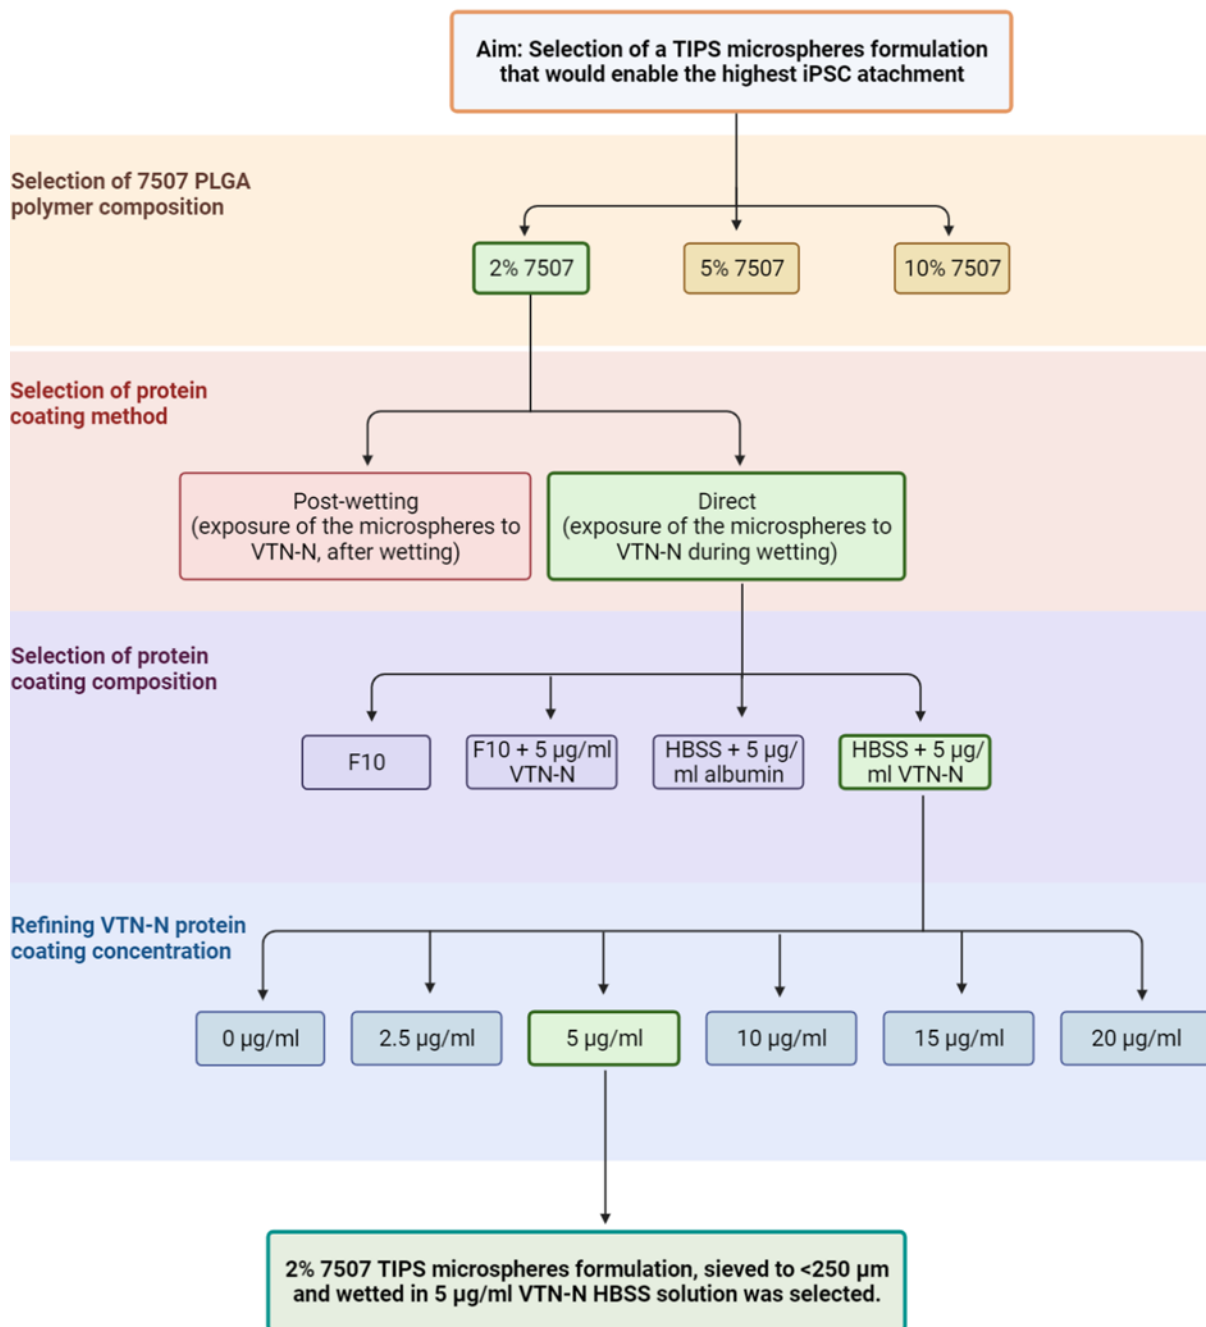

**Figure S2: Experimental strategy utilised for the selection of the TIPS microcarrier formulation that would enable the highest iPSC attachment. Selected parameters shown in green boxes.**

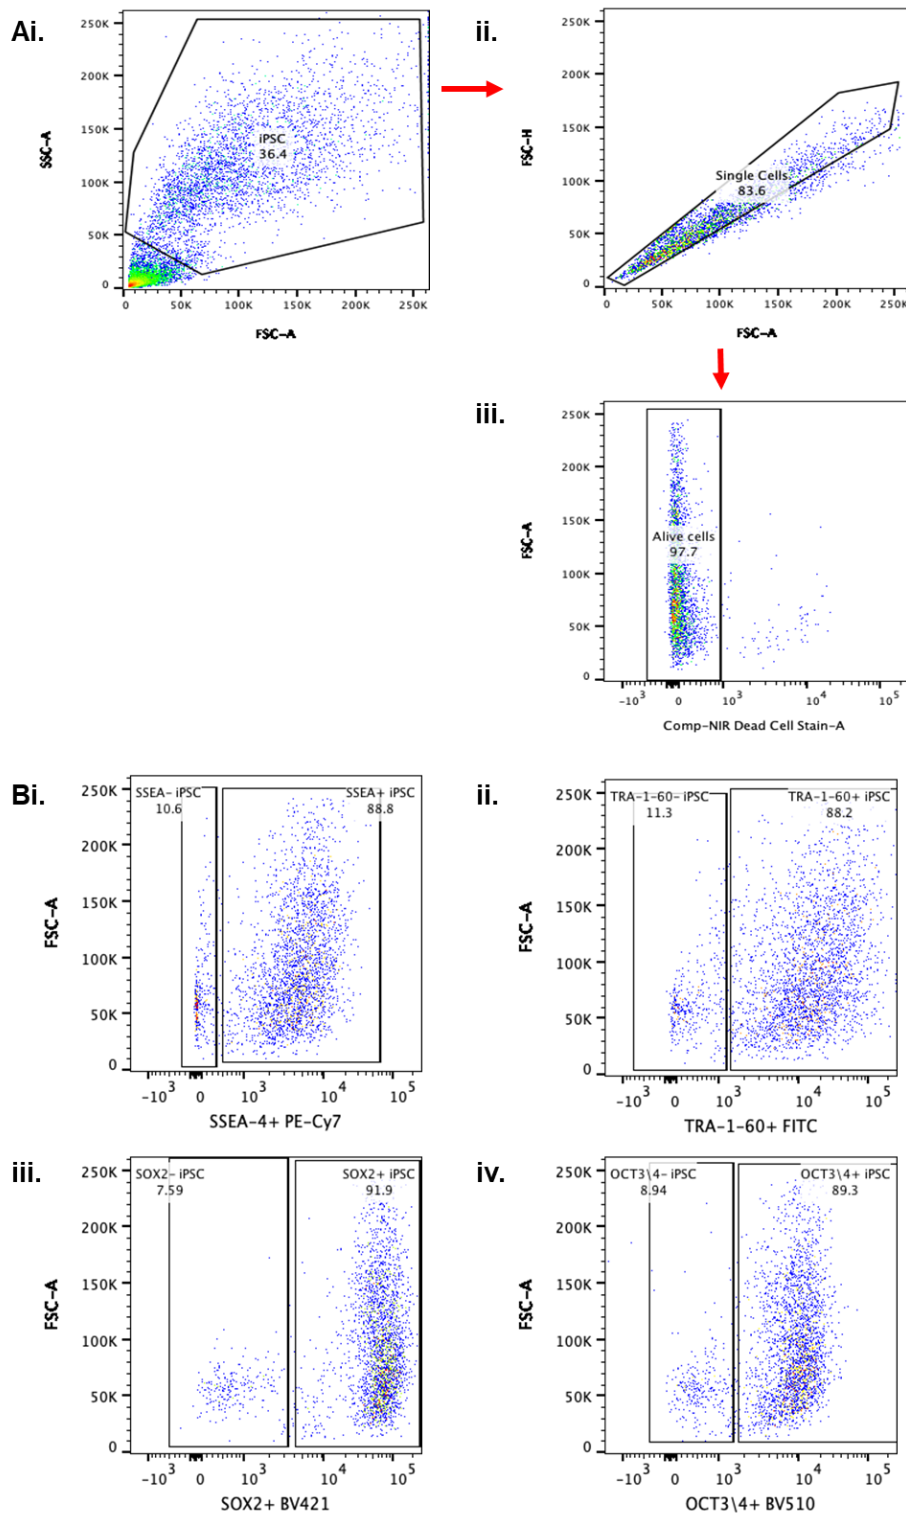

**Figure S3: Gating strategy utilised to characterise iPSC populations.** (A) Selection of live iPSC population by (i) side scatter vs. forward scatter area density plots to remove debris, (ii) side scatter vs. forward scatter height density plots to remove doublets, and (i) selection of live cells by negative expression of dead cell stain. (B) The live cell population was further gated to select the positive population of iPSC expressing (i) SSEA-4, (ii) TRA-1-60, (iii) SOX2 and (iv) OCT4. Representative plots showing gating set according to FMO controls and negative control cells.



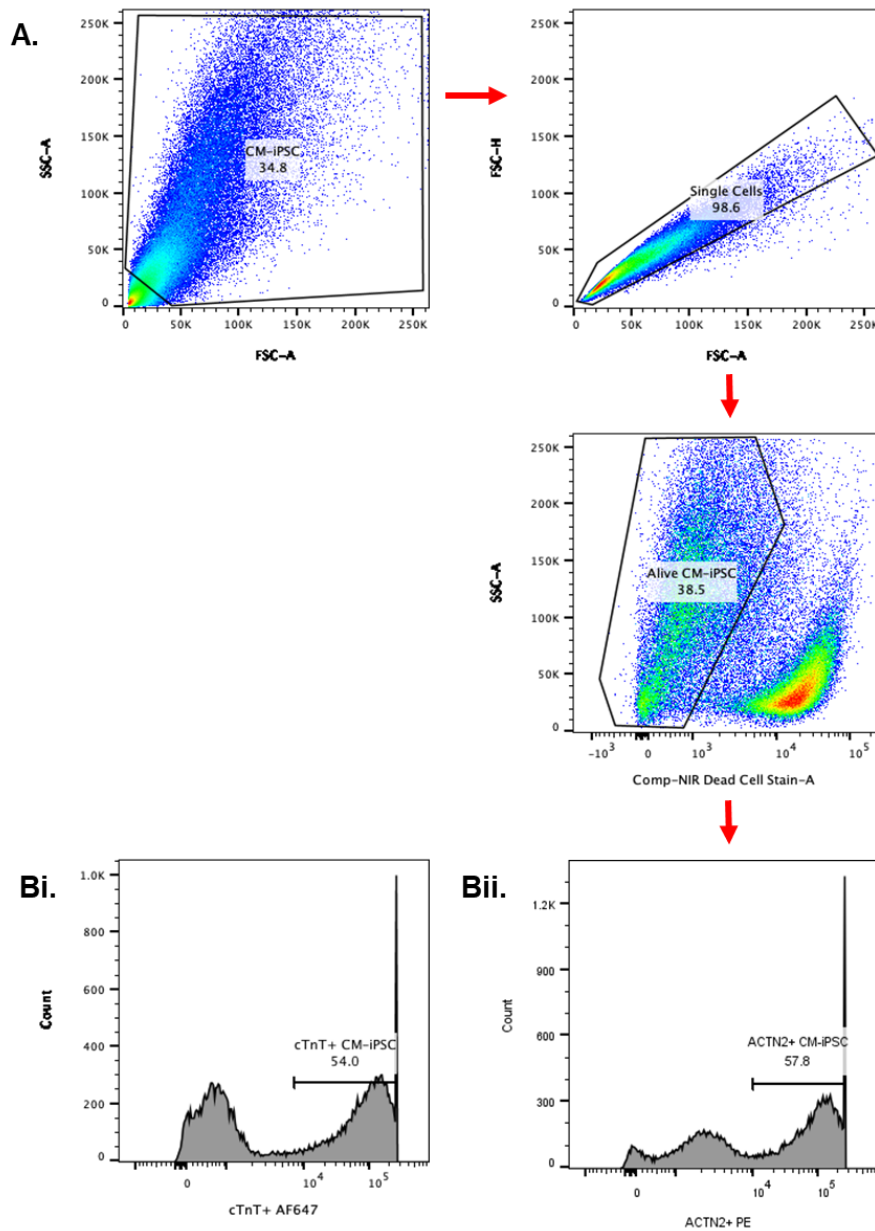

**Figure S4: Gating strategy utilised to characterise iPSC-CMs population.** (A) side scatter vs. forward scatter area density plots to remove debris, side scatter vs. forward scatter height density plots to remove doublets, and selection of live cells by negative expression of dead cell stain. (B) Selection of cTnT and ACTN2 positive cell population. Representative plots showing gating set according to unstained and negative control cells.

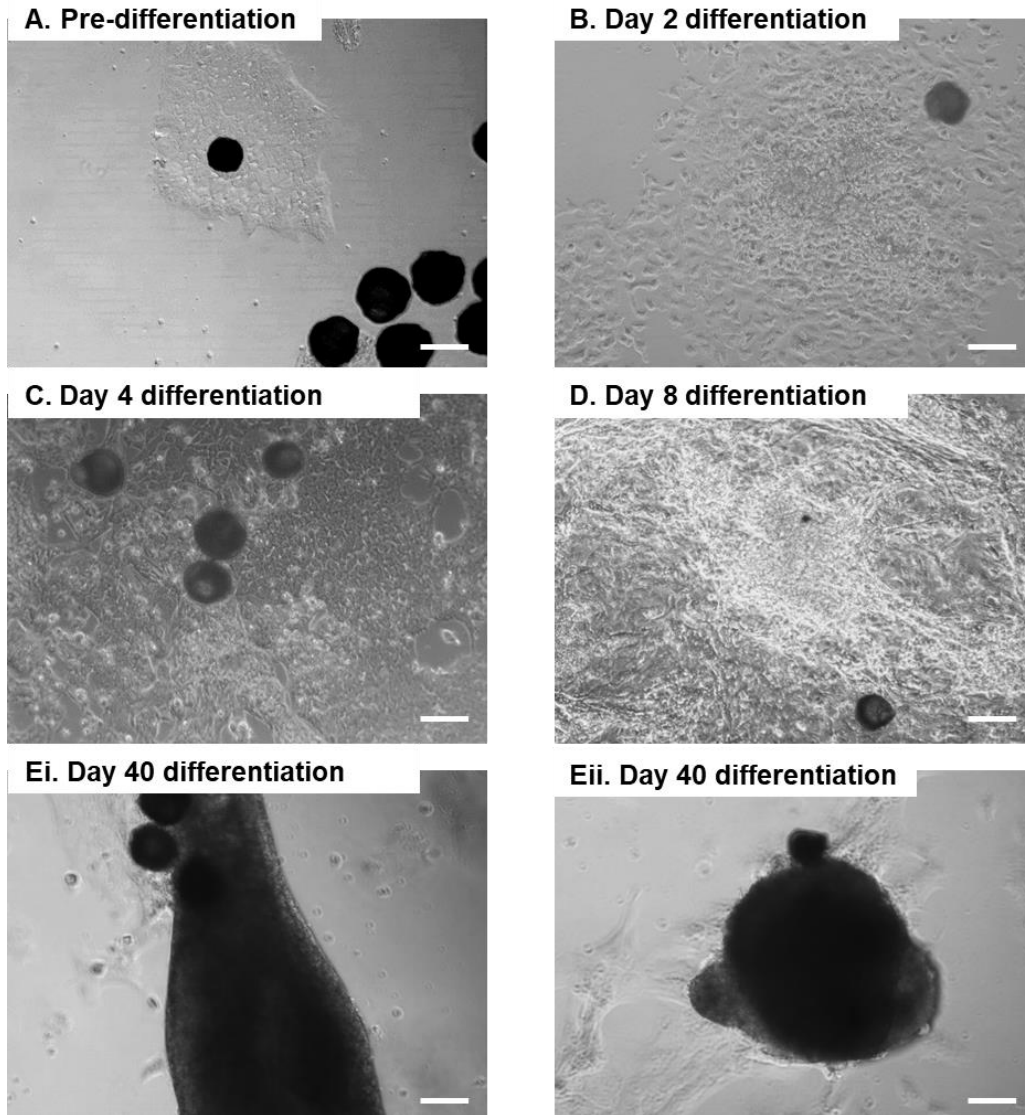

**Figure S5: iPSC migration off TIPS microcarriers, and cardiac differentiation.** (A) iPSC migrated off TIPS microcarriers onto VTN-N coated tissue culture plastic. Migrated iPSC were differentiated and imaged at (B) day 2 and (C) day 4 of cardiac differentiation. Beating bundles were visible at (D) day 8, and up to (E) day 40 of differentiation. Scale bar represents 100  $\mu\text{m}$ .

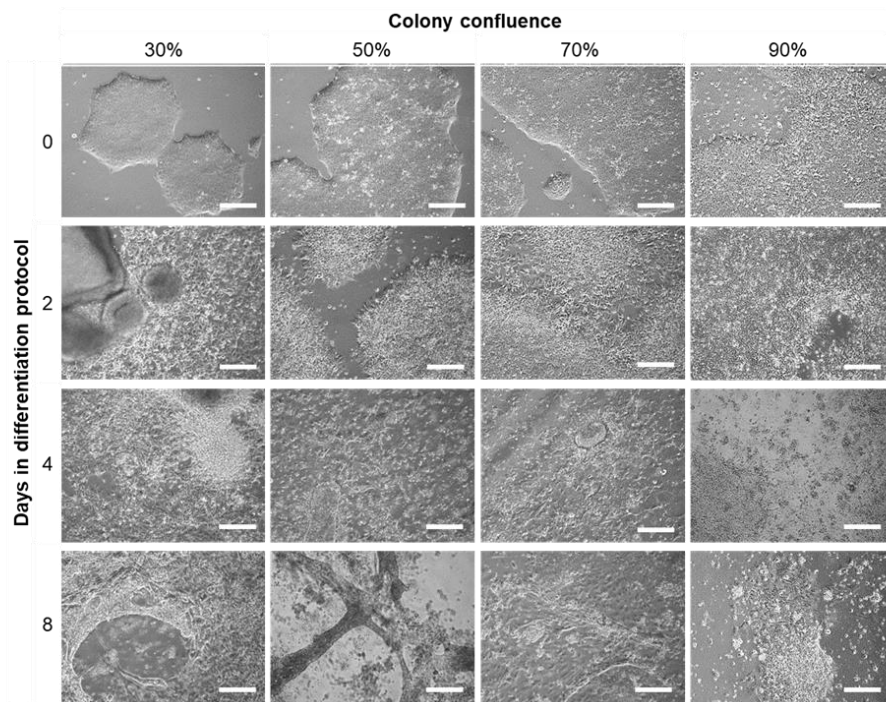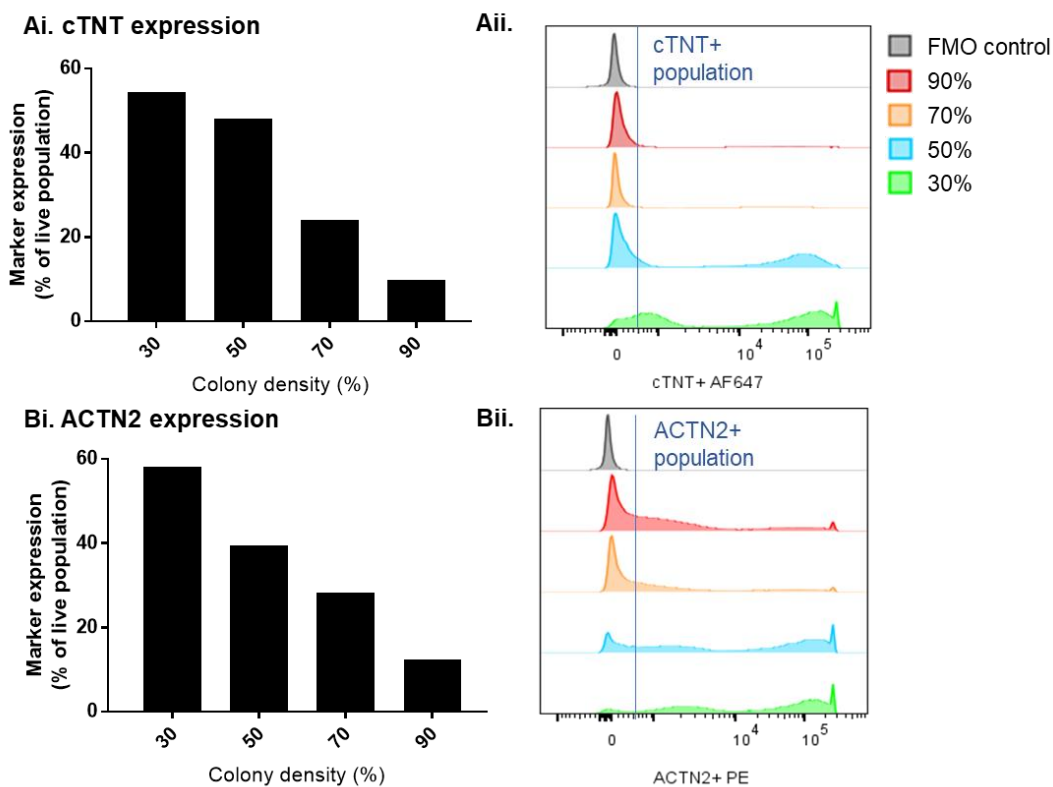

**Figure S6: Impact of colony confluency on iPSC differentiation into iPSC-CM.** Images of iPSC 4 days after seeding, at 30%, 50%, 70% and 90% colony confluence. Confluence measurements were performed by visual estimation. The colonies were differentiated into iPSC-CM for 10 days. Optimal confluence for cardiac differentiation was about 30-50%, where cells formed beating bundles from day 6-8 of differentiation. Cardiac differentiation efficiency was quantified by flow cytometric analysis of expression of cardiac markers (A) cTNT and (B) ACTN2. Scale bar represents 100  $\mu$ m. Data are presented as mean. (n=1-2).

## Western blot films for cellularised TIPS microcarrier samples

### A. Caspase 3

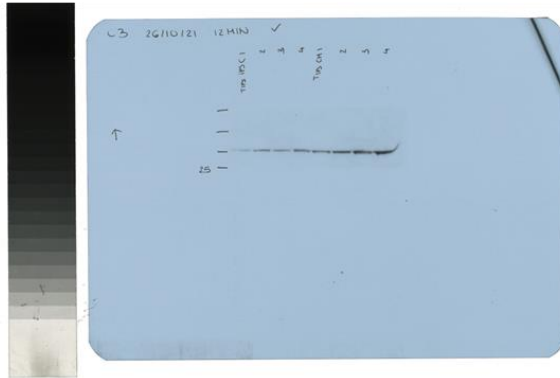

### B. Caspase 9 and cleaved caspase 3

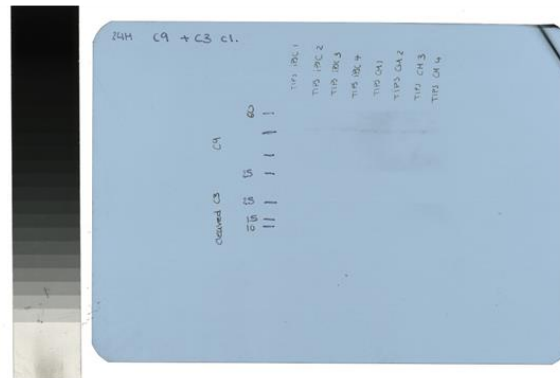

### C. GAPDH

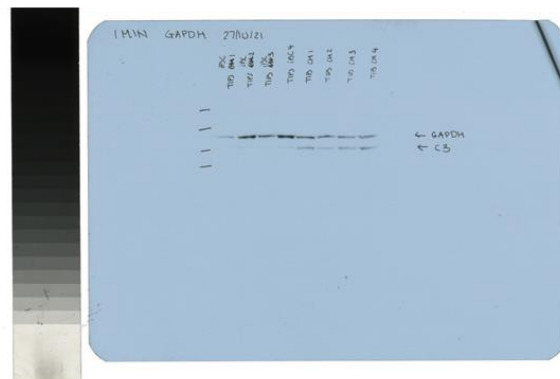

**Figure S7: Raw western blot film scans used to assess anoikis activation in cellularised TIPS microcarriers samples.** iPSC and iPSC-CM attached to TIPS microcarriers were characterised for the by the expression downstream markers of apoptosis, inactive caspases (A) 3 and (B) 9, active cleaved caspase 3. Protein quantification was normalised to the expression of housekeeper GAPDH. Cleaved caspase 3 (cleaved C3).

## Western blot films for iPSC-CM samples

### A. Cleaved caspase 3

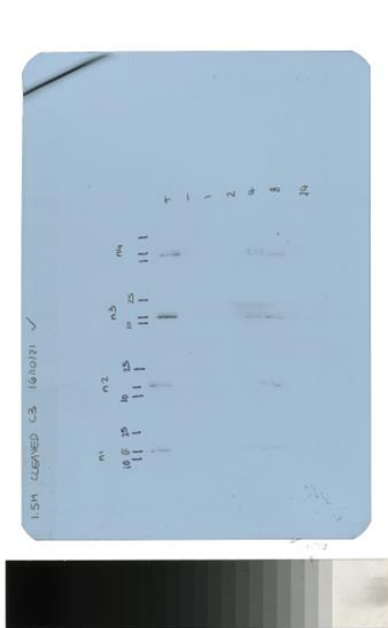

### B. Caspase 3

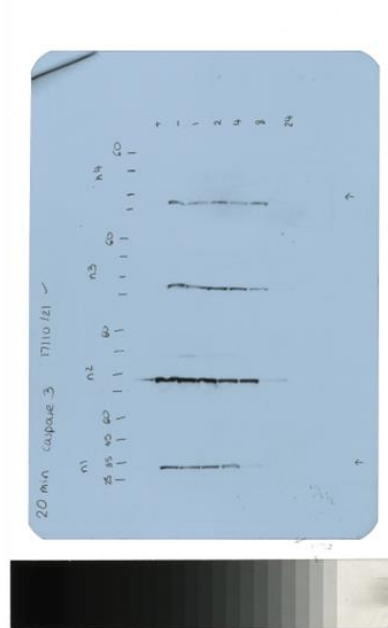

### C. Caspase 9

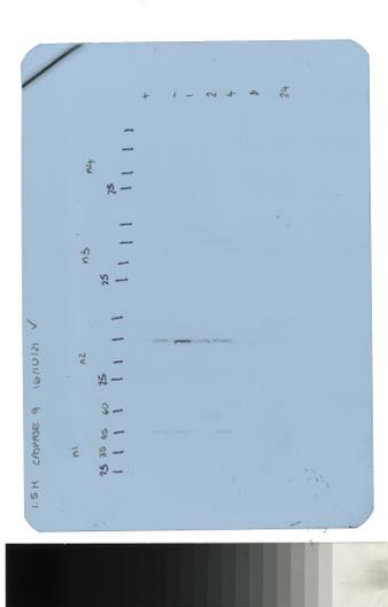

### D. GAPDH

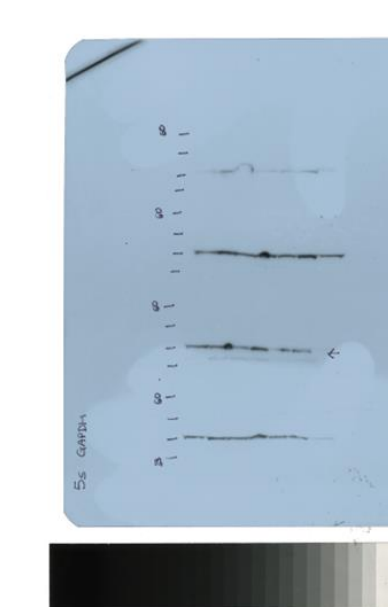

**Figure S8: Raw western blot film scans used to assess anoikis activation in iPSC-CM.** iPSC-CM controls and suspension samples were characterised for the by the expression downstream markers of apoptosis, inactive caspases (B) 3 and (C) 9, (A) active cleaved caspase 3. (D) Protein quantification was normalised to the expression of housekeeper GAPDH. Negative control (-) refers to cells cultured on 2D tissue culture plastic surfaces, Positive control (+) for the onset of cell death were treated with 100  $\mu$ M etoposide for 4 hours, Hours (h) refers to the amount of time samples were held in suspension to induce anoikis, Cleaved caspase 3 (cleaved C3).

## Western blot films for iPSC samples (sample 1)

### A. Caspase 3

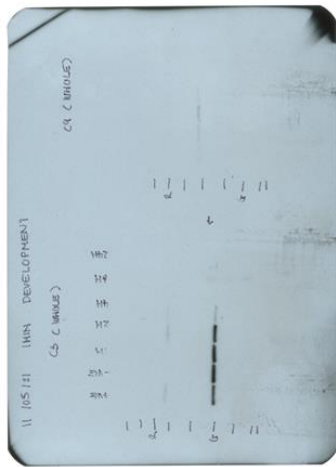

### B. Caspase 9

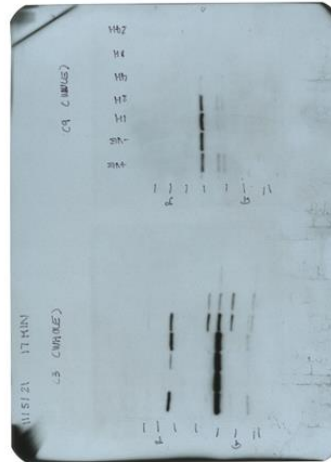

### C. Cleaved caspase 3

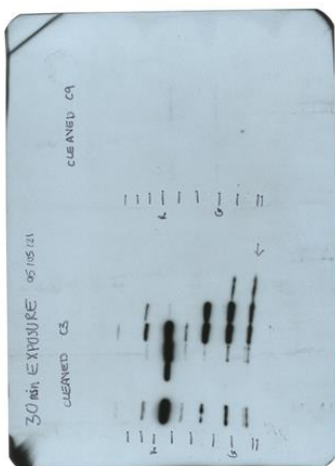

### D. GAPDH

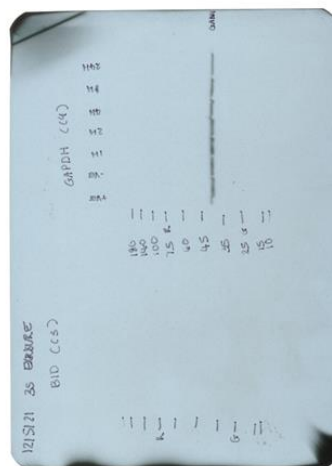

### E. GAPDH

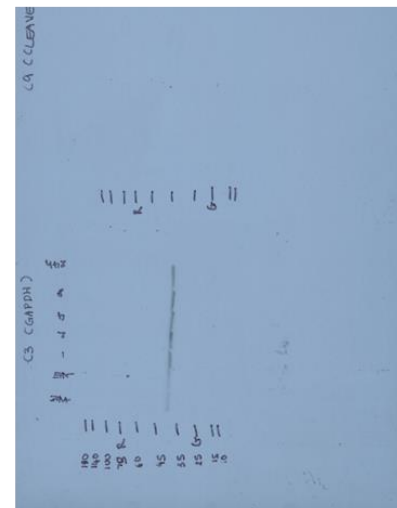

**Figure S9: Raw western blot film scans used to assess anoikis activation in iPSC.** iPSC controls and suspension samples were characterised for the by the expression downstream markers of apoptosis, inactive caspases (A) 3 and (B) 9, (C) active cleaved caspase 3. (D-E) Protein quantification was normalised to the expression of housekeeper GAPDH. Negative control (-) refers to cells cultured in 2D control conditions, Positive control (+) for the onset of cell death were treated with 100  $\mu$ M etoposide for 4 hours, Hours (h) refers to the amount of time samples were held in suspension to induce anoikis, Cleaved caspase 3 (cleaved C3).





### A. Activation of anoikis in iPSC

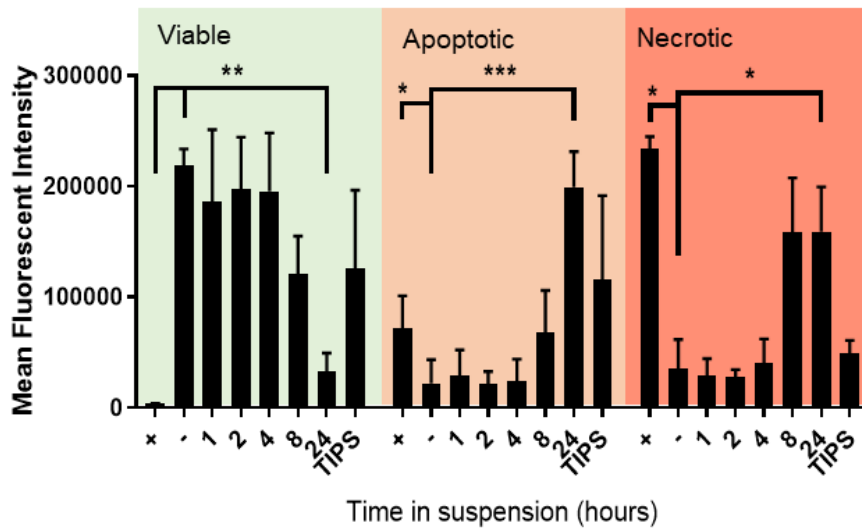

### B. Activation of anoikis in iPSC-CM

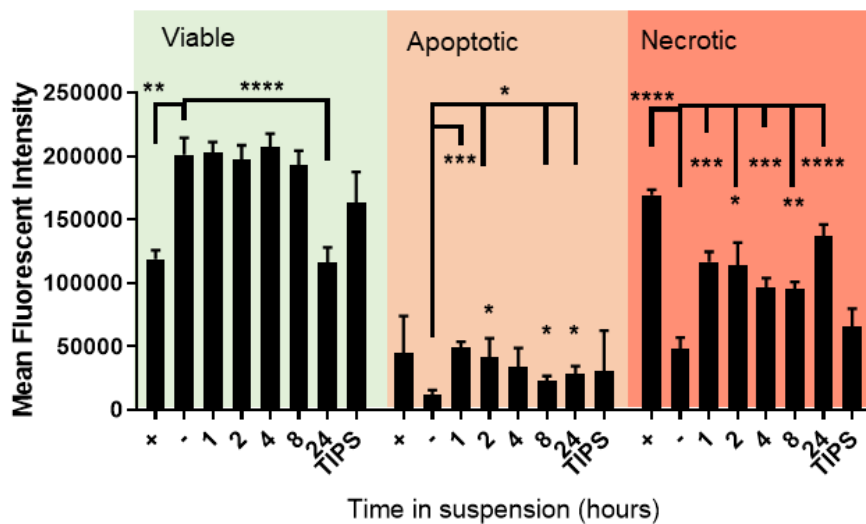

**Figure S11: Flow cytometry assessment of anoikis of iPSC and iPSC- CM pre- and post-attachment to TIPS microspheres.** (A) iPSC and (B) iPSC-CM were cultured in suspension up to 24 hours or attached to TIPS microspheres for 24 hours. iPSC and CM-iPSC attached onto 5 µg/ml VTN-N coated 6-well tissue culture plates were used as negative controls. Positive controls were treated with 10 µM staurosporine for 24 hours. Data are presented as mean ±SD. The significance of the data was calculated two-way ANOVA with Dunnett's post-hoc correction. (n=4-6, \*P≤0.05, \*\*P≤0.01, \*\*\*P≤0.001, \*\*\*\*P≤0.0001, statistics to matched negative control).



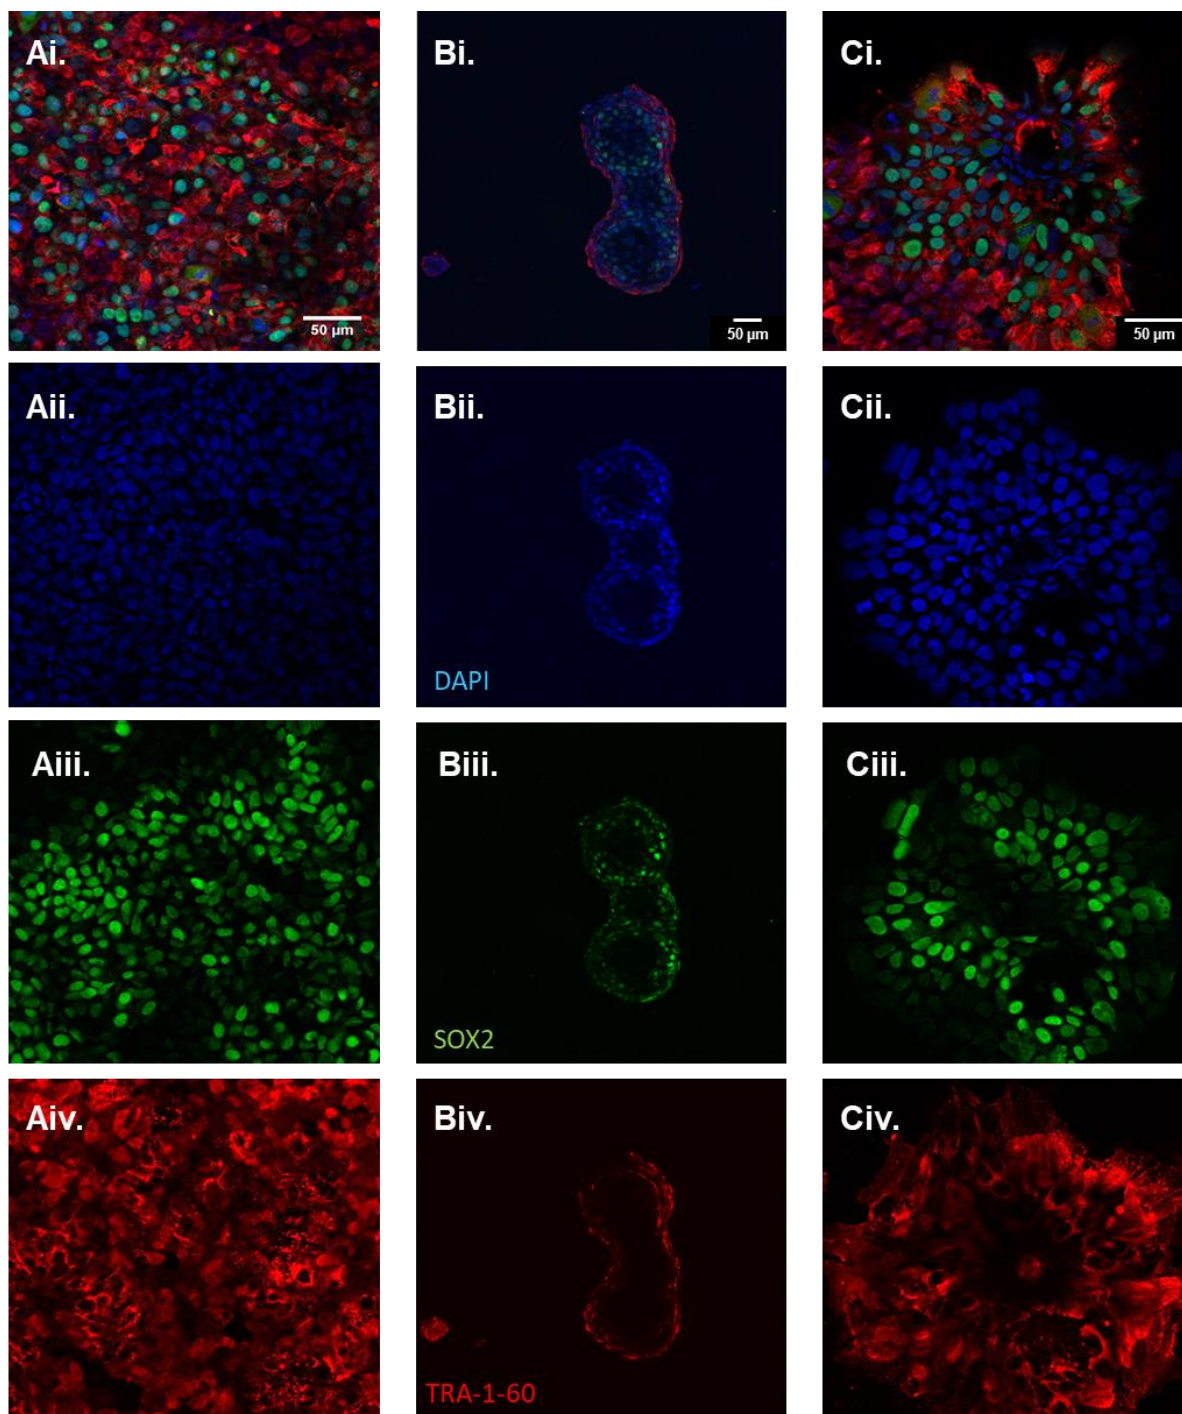

**Figure S12: Immunofluorescence analysis of iPSC pluripotency.** Retention of iPSC pluripotency markers, SOX2 (green) TRA-1-60 (red) and DAPI (blue), in (A) 2D control tissue culture plastic conditions, (B) attached to TIPS microcarriers and (C) migrated for 72 hours, off TIPS microcarriers and onto 2D control conditions. Scale bars represent 50 μm.

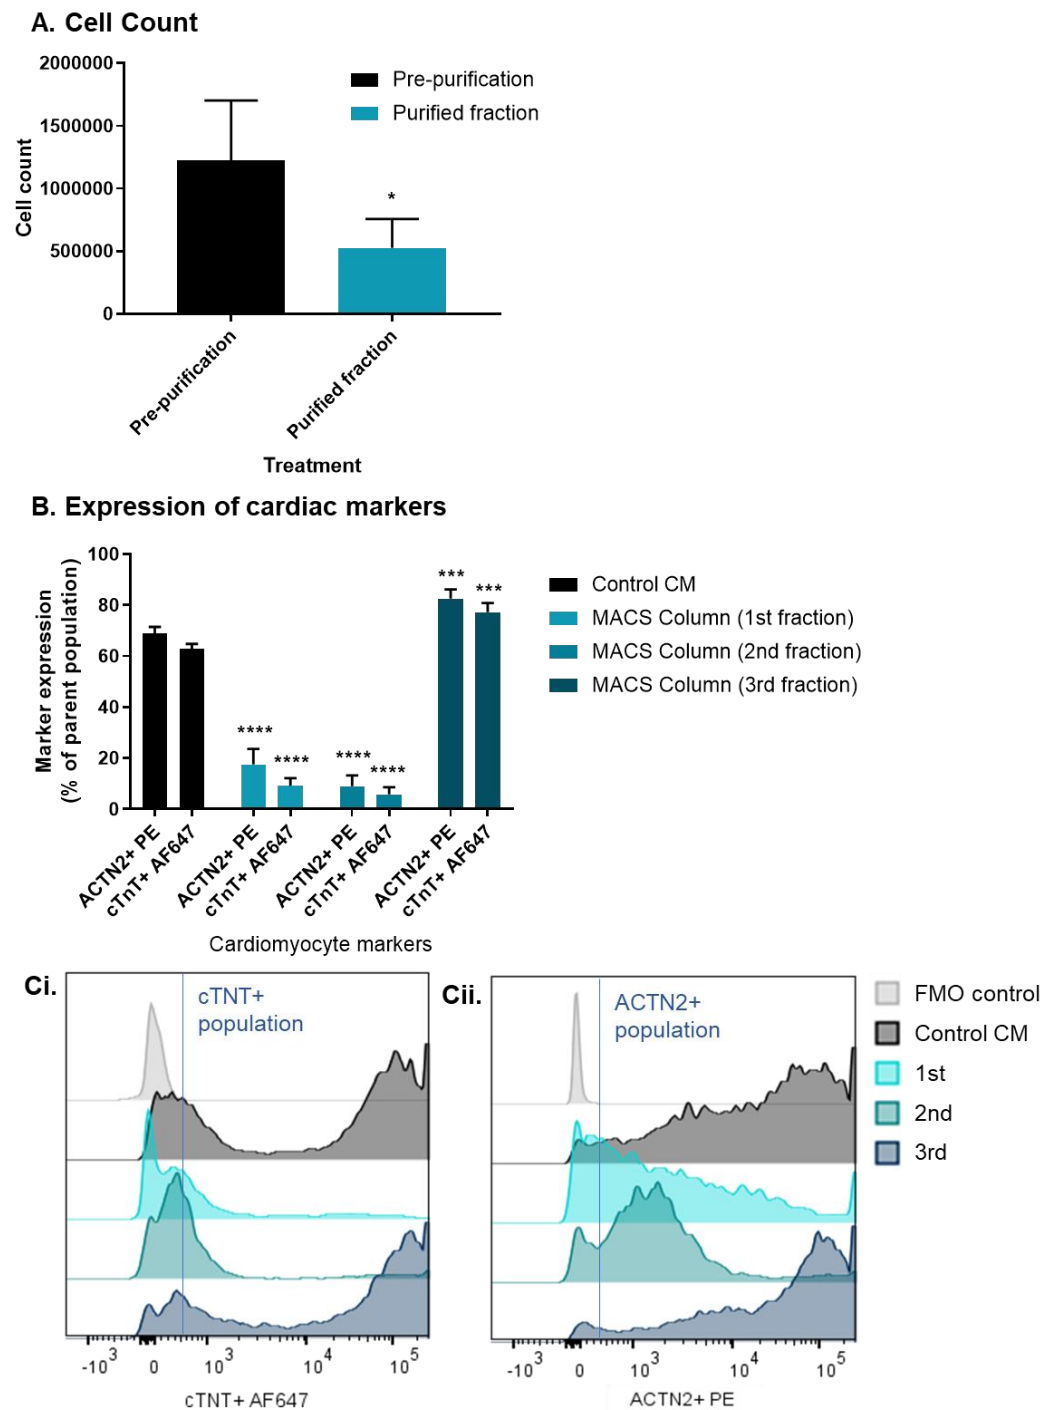

**Figure S13: Characterisation of magnetically purified iPSC-CM.** iPSC-CM were purified on day 18 of differentiation and marker expression was quantified immediately after purification. (A) Cell count pre- and post- enrichment. (B) Flow cytometric characterisation of the expression of cardiac markers (Ci) cTNT and (Cii) ACTN2 in each purification fraction. The non-CM were collected from the MACS column, as the 1<sup>st</sup> fraction. The second step positively selected CMs, flushing out the non-CM. The flushed out non-CM were collected as the 2<sup>nd</sup> fraction. Ultimately, the magnetically selected CM, and final product, were collect as the 3<sup>rd</sup> and final fraction. Data are presented as mean  $\pm$ SD. The significance of the data was calculated (A) Unpaired Two-tailed t-test and (B) two-way ANOVA with Sidak's post-hoc correction. (n=4, \*P $\leq$ 0.05, \*\*\*P $\leq$ 0.001, \*\*\*\*P $\leq$ 0.0001, statistics to matched negative control).

### A. Viability of iPSC-CM on TIPS microcarriers post-injection

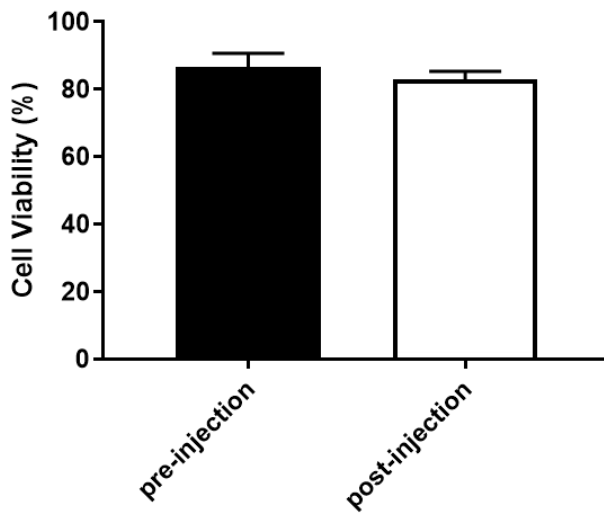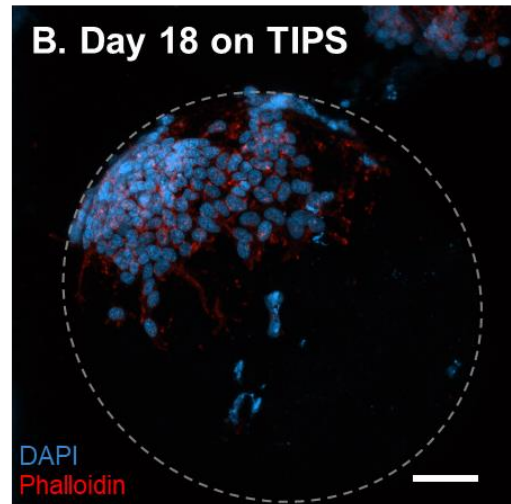

**Figure S14: Further assessment of injectable iPSC-CM cellularised TIPS microcarriers.**  $1 \times 10^6$  enriched Day 18 iPSC-CM were seeded on 20 mg of microcarriers and incubated under static dynamic conditions for 24 hours. The media was replaced, and the cells were left to recover for another 72 hours. 4 days after cell seeding, the sample was resuspended in 600  $\mu$ L of 60% GranuGel® and injected through a 23G needle capped syringe into a 24 well low-bind plate and the samples were immediately analysed for cell viability or cultured in EB 2% media for an additional 14 days. (A) Viability of iPSC-CM on TIPS microcarriers pre- and post-injection. Percentage cell viability in the sample was quantified using a Chemometec automated cell counter, with viability determined by the use of fluorescent dyes acridine orange and DAPI. (B) Confocal micrograph of iPSC-CM cultured on TIPS microcarriers for 18 days. TIPS microcarrier outlined by dotted grey line. The samples were fixed and stained for nuclear (DAPI blue) and cytoskeleton (phalloidin red) markers. Scale bar represents 50  $\mu$ m. Data are presented as mean  $\pm$ SD. n=2.

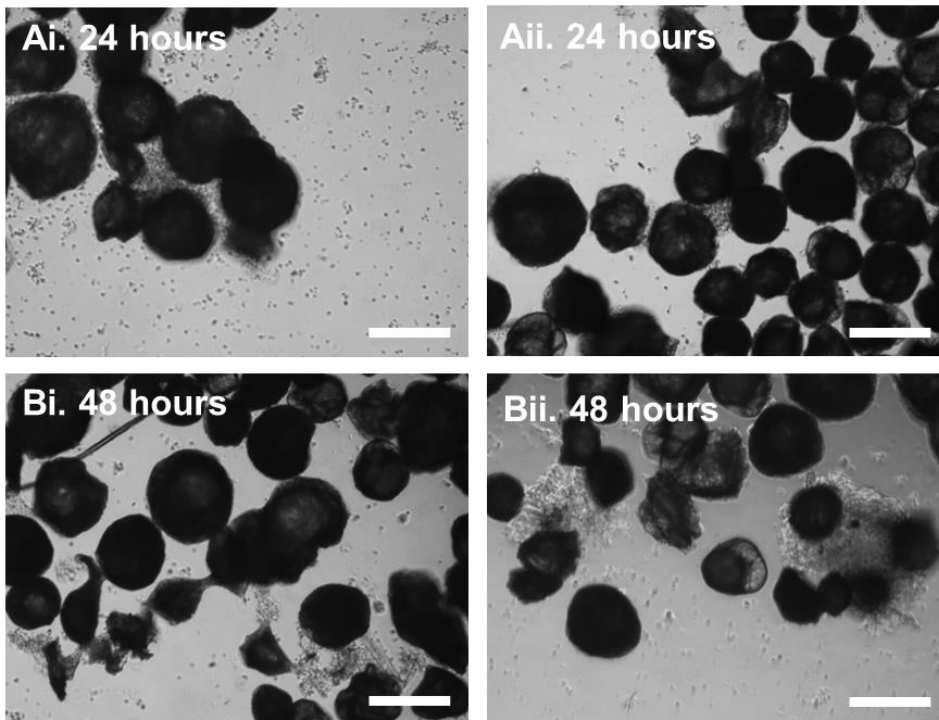

### C. Quantification of cell attachment on microcarriers

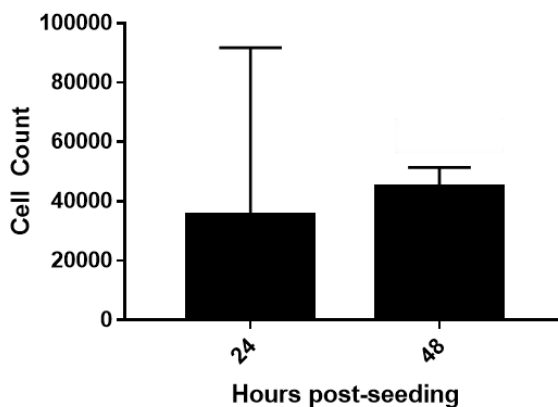

**Figure S15: Late iPSC-CM do not expand on TIPS microcarriers.**  $2 \times 10^5$  day 18 iPSC-CM were seeded on 20 mg of  $<250 \mu\text{m}$  2% 7507 TIPS microcarriers coated with  $5 \mu\text{g/ml}$  VTN-N and attached under static dynamic conditions. Light microscopy images show iPSC-CM attached to TIPS microcarriers after (A) 24 and (B) 48 hours post-seeding. Scale bars represent  $100 \mu\text{m}$ . (C) Quantification of cell attachment suggests that the fraction of cells that attaches the microspheres, does not expand. Data are presented as mean  $\pm$ SD. The significance of the data was calculated by two-tailed non-parametric t-test with Mann-Whitney post-hoc analysis. ( $n=3-4$ ,  $P=0.34$ ).
